# Supplementary material for: Te4Se2O6 macrocycle stabilizing triangular planar and tetrahedral anions
Source: Royal Society of Chemistry journal article supplement (doi:10.1039/c4dt03911d), 2015-01-01
Supplement: c4dt03911d1.pdf [file c4dt03911d1.pdf]

# 12-Membered Inorganic Macrocycle

## Stabilizing Anions of varying Geometry

*Nagarjuna Kumar Srungavruksham and Viswanathan Baskar\**.

School of Chemistry, University of Hyderabad, Hyderabad 500046, A.P., India. Tel: 91-40-23134825; E-mail: [vbsc@uohyd.ernet.in](mailto:vbsc@uohyd.ernet.in).

### Supporting information:

#### C-H...O and C-H...F interactions:

Apart from the strong Te-O and Se-O interactions in **2**, **3** and Te-F, Se-F interactions in **4**, we have also found some weak intermolecular C-H...O interactions in **2**, **3** and C-H...F interactions in **4** respectively. The C-H...O interactions in **2**, **3** arises between selenium attached phenyl CH of one macrocycle with one of the oxygens of nitrate anion (or) one of the oxygens of perchlorate anion of the another macrocycle respectively. The C-H...F interactions in **4** arises between selenium attached phenyl CH of one macrocycle with one of the fluorine atoms of tetrafluoroborate anion of another macrocycle. These weak interactions have led to the formation of interesting polymeric supramolecular assemblies in solid state (Figure S1). The C-H...O, C-H...F distances and the angles at hydrogen in **2-4** were given in the below table.<sup>6</sup>

|                   | H...O(Å) | C...O(Å) | C-H...O(deg) |
|-------------------|----------|----------|--------------|
| Compound <b>2</b> | 2.65     | 3.50     | 154          |
| Compound <b>3</b> | 2.45     | 3.13     | 130          |
|                   | H...F(Å) | C...F(Å) | C-H...F(deg) |
| Compound <b>4</b> | 2.43     | 3.10     | 128          |

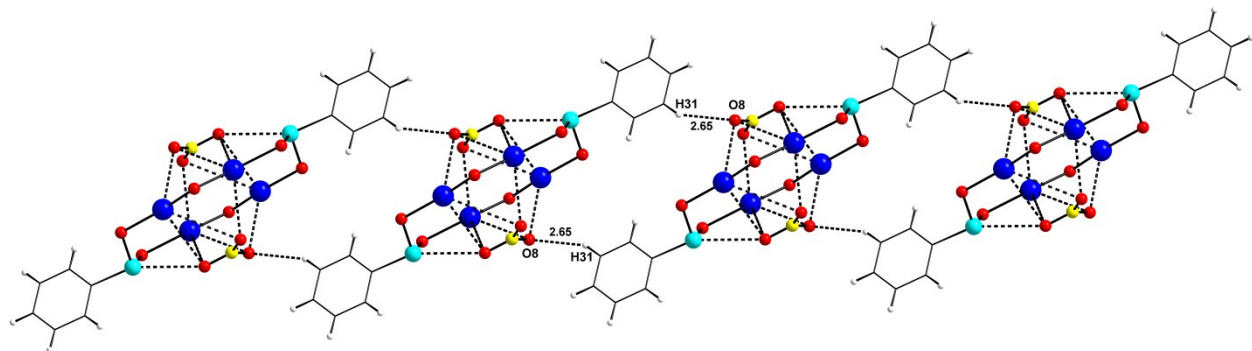

(a)

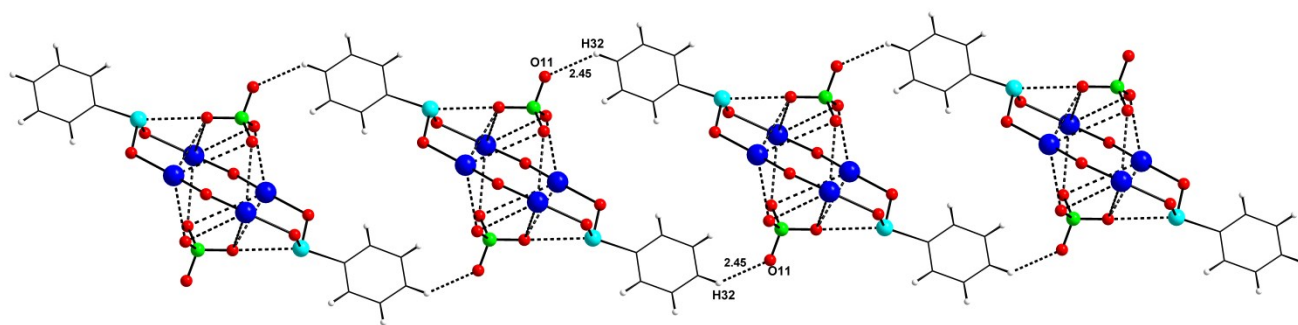

(b)

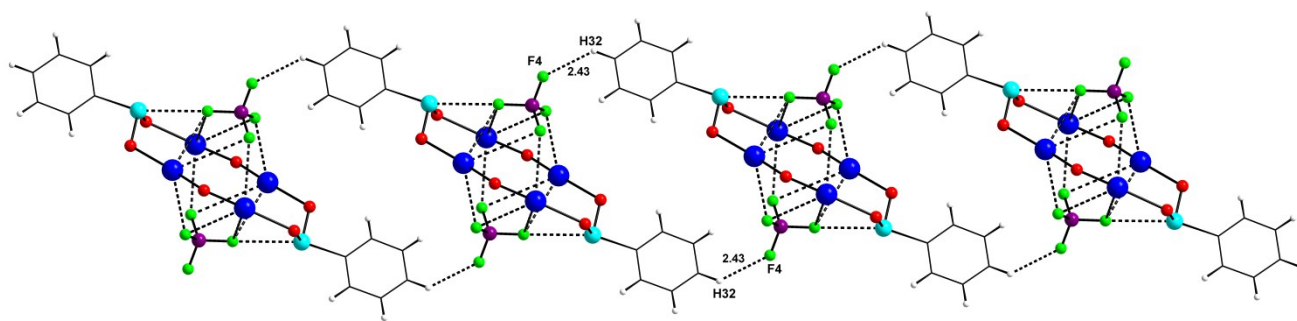

(c)

Figure S1: Supramolecular assemblies showing C-H...O interactions in **2(a)**, **3(b)** and C-H...F interactions in **4(c)**. Anisyl rings attached to tellurium are omitted for clarity.

Table S1: Deviation of each atom from the mean plane (Å) in 12-membered Te<sub>4</sub>Se<sub>2</sub>O<sub>6</sub> ring

| label | 2            | 3            | 4            |
|-------|--------------|--------------|--------------|
| Te1   | ± 0.0894(4)  | ± 0.1188(4)  | ± 0.1204(3)  |
| Te2   | ± 0.1006(4)  | ± 0.1050(4)  | ± 0.1108(3)  |
| Se1   | ± 0.6304(4)  | ± 0.6221(5)  | ± 0.6244(3)  |
| O1    | ± 0.2203(17) | ± 0.1757(17) | ± 0.1850(14) |
| O2    | ± 0.5391(17) | ± 0.4585(18) | ± 0.4704(15) |
| O3    | ± 0.0791(18) | ± 0.1309(18) | ± 0.1170(14) |

Table S2: Torsion angles list in 2-4

|                | 2                | 3              | 4                |
|----------------|------------------|----------------|------------------|
| <b>At Se1</b>  |                  |                |                  |
| C30-C29-Se1-O3 | 45.8(2)[+sc]     | -76.8(3)[-sc]  | -75.65(19)[-sc]  |
| C30-C29-Se1-O2 | -59.7(2)[-sc]    | 176.3(3)[+ap]  | 177.57(18)[+ap]  |
| C34-C29-Se1-O2 | 121.17(18)[+ac]  | -1.9(2)[-sp]   | -0.66(17)[-sp]   |
| C34-C29-Se1-O3 | -133.32(18)[-ac] | 105.0(2)[+ac]  | 106.12(17)[+ac]  |
| <b>At Te1</b>  |                  |                |                  |
| C2-C1-Te1-O2   | 29.8(2)[+sp]     | -135.6(2)[-ac] | -135.92(18)[-ac] |
| C2-C1-Te1-O1   | -153.8(2)[-ap]   | 38.4(2)[+sc]   | 37.84(18)[+sc]   |
| C6-C1-Te1-O1   | 29.0(2)[+sp]     | -141.3(2)[-ac] | -140.75(18)[-ac] |
| C6-C1-Te1-O2   | -147.4(2)[-ac]   | 44.8(2)[+sc]   | 45.49(17)[+sc]   |
|                |                  |                |                  |
| C9-C8-Te1-O2   | 39.29(18)[+sc]   | -142.1(2)[-ac] | -140.84(17)[-ac] |
| C9-C8-Te1-O1   | -134.17(18)[-ac] | 44.4(2)[+sc]   | 45.97(16)[+sc]   |
| C13-C8-Te1-O1  | 46.14(19)[+sc]   | -138.0(2)[-ac] | -135.65(17)[-ac] |
| C13-C8-Te1-O2  | -140.40(-ac)     | 35.6(2)[+sc]   | 37.54(17)[+sc]   |
| <b>At Te2</b>  |                  |                |                  |
| C16-C15-Te2-O3 | -148.0(2)[-ac]   | 136.1(3)[+ac]  | 136.17(19)[+ac]  |
| C16-C15-Te2-O1 | 42.5(2)[+sc]     | -35.4(3)[-sc]  | -35.56(18)[-sc]  |
| C20-C15-Te2-O1 | -140.1(2)[-ac]   | 145.1(3)[+ac]  | 143.06(19)[+ac]  |
| C20-C15-Te2-O3 | 29.38(19)[+sp]   | -43.5(3)[-sc]  | -45.21(18)[-sc]  |
|                |                  |                |                  |
| C23-C22-Te2-O3 | -132.1(2)[-ac]   | 31.9(2)[+sc]   | 29.77(17)[+sp]   |
| C23-C22-Te2-O1 | 39.1(2)[+sc]     | -155.2(2)[-ap] | -157.68(18)[-ap] |
| C27-C22-Te2-O1 | -141.1(2)[-ac]   | 21.7(2)[+sp]   | 19.83(17)[+sp]   |
| C27-C22-Te2-O3 | 47.77(19)[+sc]   | -151.2(3)[-ap] | -152.72(17)[-ap] |

Table S3: crystallographic data for **2-4**

|                                            | <b>2</b>                                                             | <b>3</b>                                                             | <b>4</b>                                                             |
|--------------------------------------------|----------------------------------------------------------------------|----------------------------------------------------------------------|----------------------------------------------------------------------|
| Formula                                    | $C_{80}H_{78}N_2O_{20}Se_2Te_4$                                      | $C_{86}H_{84}Cl_2O_{22}Se_2Te_4$                                     | $C_{86}H_{84}B_2F_8O_{14}Se_2Te_4$                                   |
| $f_w$                                      | 2055.76                                                              | 2208.75                                                              | 2183.47                                                              |
| Temperature [K]                            | 100                                                                  | 100                                                                  | 100                                                                  |
| Crystal system                             | Triclinic                                                            | Triclinic                                                            | Triclinic                                                            |
| Space group                                | P-1                                                                  | P-1                                                                  | P-1                                                                  |
| Crystal size [mm]                          | 0.40 x 0.28 x 0.12                                                   | 0.80 x 0.46 x 0.28                                                   | 0.40 x 0.30 x 0.14                                                   |
| $a$ [Å]                                    | 11.9793(8)                                                           | 12.2163                                                              | 12.1225(9)                                                           |
| $b$ [Å]                                    | 13.0047(9)                                                           | 14.8089(13)                                                          | 14.7726(11)                                                          |
| $c$ [Å]                                    | 14.3277(10)                                                          | 15.9691(14)                                                          | 15.9277(12)                                                          |
| $\alpha$ [°]                               | 107.5360(10)                                                         | 71.3950(10)                                                          | 71.2340(10)                                                          |
| $\beta$ [°]                                | 109.9690(10)                                                         | 70.1130(10)                                                          | 70.0790(10)                                                          |
| $\gamma$ [°]                               | 92.5130(10)                                                          | 82.3580(10)                                                          | 82.4160(10)                                                          |
| $V$ [Å <sup>3</sup> ]                      | 1973.4(2)                                                            | 2573.7(4)                                                            | 2538.3(3)                                                            |
| $Z$                                        | 1                                                                    | 1                                                                    | 1                                                                    |
| $d_{\text{calcd.}}$ [Mgm <sup>-3</sup> ]   | 1.730                                                                | 1.425                                                                | 1.428                                                                |
| $\mu$ [mm <sup>-1</sup> ]                  | 2.459                                                                | 1.942                                                                | 1.922                                                                |
| $F(000)$                                   | 1008                                                                 | 1086                                                                 | 1070                                                                 |
| $\theta$ range for data collection [°]     | 1.61 to 25.01                                                        | 1.42 to 26.37                                                        | 1.42 to 25.50                                                        |
| index ranges                               | -14 $\leq h \leq$ 14<br>-15 $\leq k \leq$ 15<br>-17 $\leq l \leq$ 17 | -15 $\leq h \leq$ 15<br>-18 $\leq k \leq$ 18<br>-19 $\leq l \leq$ 19 | -14 $\leq h \leq$ 14<br>-17 $\leq k \leq$ 17<br>-19 $\leq l \leq$ 19 |
| Reflections collected/unique               | 18995/6948                                                           | 27402/10449                                                          | 25469/9431                                                           |
| R(int.)                                    | 0.0171                                                               | 0.0260                                                               | 0.0182                                                               |
| Data/restraints/parameters                 | 6948 / 0 / 491                                                       | 10449 / 0 / 527                                                      | 9431 / 0 / 527                                                       |
| GoF on $F^2$                               | 1.091                                                                | 1.035                                                                | 1.028                                                                |
| $R_1/wR_2$ [ $I > 2\sigma(I)$ ]            | 0.0198/0.0493                                                        | 0.0275/0.0730                                                        | 0.0196/0.0500                                                        |
| $R_1/wR_2$ [all data]                      | 0.0208/0.0498                                                        | 0.0293/0.0740                                                        | 0.0210/0.0506                                                        |
| Largest diff peak/hole [eÅ <sup>-3</sup> ] | 0.614/-0.480                                                         | 1.832/-0.641                                                         | 0.573/-0.369                                                         |

Table S4. selected bond lengths and bond angles in 2-4

|             | 2          | 3           | 4          |             |            |
|-------------|------------|-------------|------------|-------------|------------|
| Te1-O1      | 1.9952(14) | Te1-O1      | 1.9925(16) | Te1-O1      | 1.9917(13) |
| Te1-O2      | 2.3475(15) | Te1-O2      | 2.3294(16) | Te1-O2      | 2.3260(13) |
| Te2-O1      | 2.0105(15) | Te2-O1      | 2.0025(15) | Te2-O1      | 2.0032(12) |
| Te2-O3*     | 2.2909(15) | Te2-O3*     | 2.3083(16) | Te2-O3      | 2.3102(13) |
| Te1-C1      | 2.108(2)   | Te1-C1      | 2.101(2)   | Te1-C1      | 2.0996(19) |
| Te1-C8      | 2.100(2)   | Te1-C8      | 2.099(2)   | Te1-C8      | 2.1021(18) |
| Te2-C15     | 2.110(2)   | Te2-C15     | 2.106(2)   | Te2-C15     | 2.1117(19) |
| Te2-C22     | 2.101(2)   | Te2-C22     | 2.108(2)   | Te2-C22     | 2.1037(18) |
| Se1-O2      | 1.6989(15) | Se1-O2      | 1.6934(17) | Se1-O2      | 1.6974(13) |
| Se1-O3      | 1.6961(15) | Se1-O3      | 1.7018(17) | Se1*-O3     | 1.7060(13) |
| Se1-C29     | 1.919(2)   | Se1-C29     | 1.925(2)   | Se1-C29     | 1.9280(19) |
| O2-Se1-O3   | 103.91(8)  | O2-Se1-O3   | 105.29(9)  | O2-Se1-O3*  | 105.16(7)  |
| O1-Te1-O2   | 172.73(6)  | O1-Te1-O2   | 171.68(6)  | O1-Te1-O2   | 171.26(5)  |
| O1-Te2-O3*  | 167.11(6)  | O1-Te2-O3*  | 169.64(6)  | O1-Te2-O3   | 169.65(7)  |
| Te1-O1-Te2  | 114.39(7)  | Te1-O1-Te2  | 116.63(8)  | Te1-O1-Te2  | 116.86(6)  |
| Te1-O2-Se1  | 112.12(7)  | Te1-O2-Se1  | 118.23(8)  | Te1-O2-Se1  | 118.00(7)  |
| Se1-O3-Te2* | 122.68(8)  | Se1-O3-Te2* | 119.72(8)  | Se1*-O3-Te2 | 119.24(7)  |

ORTEP diagrams:

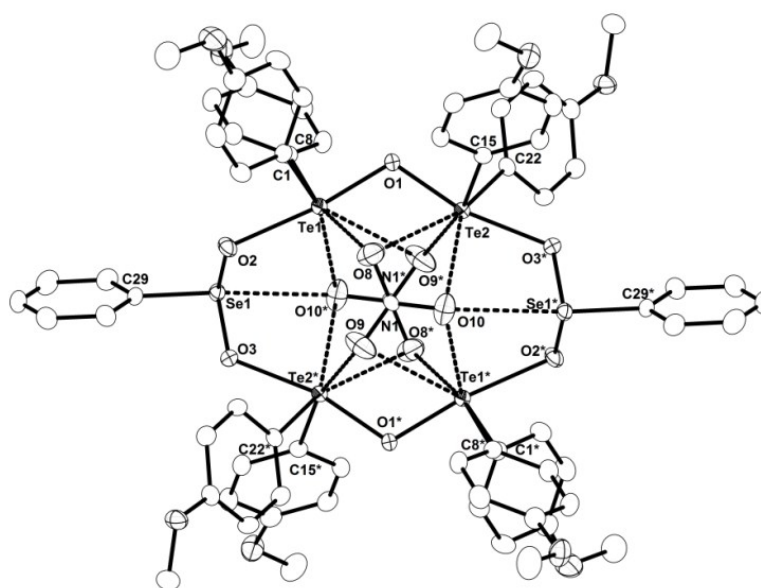

(a)

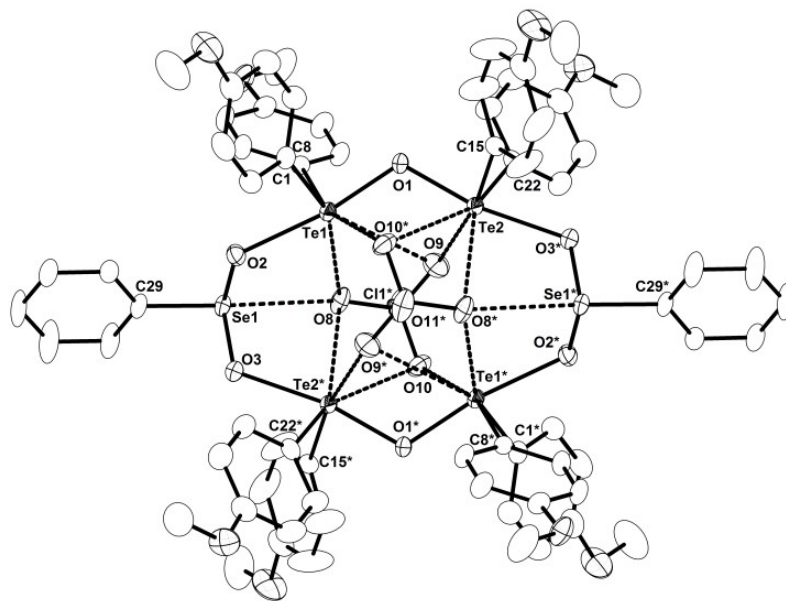

(b)

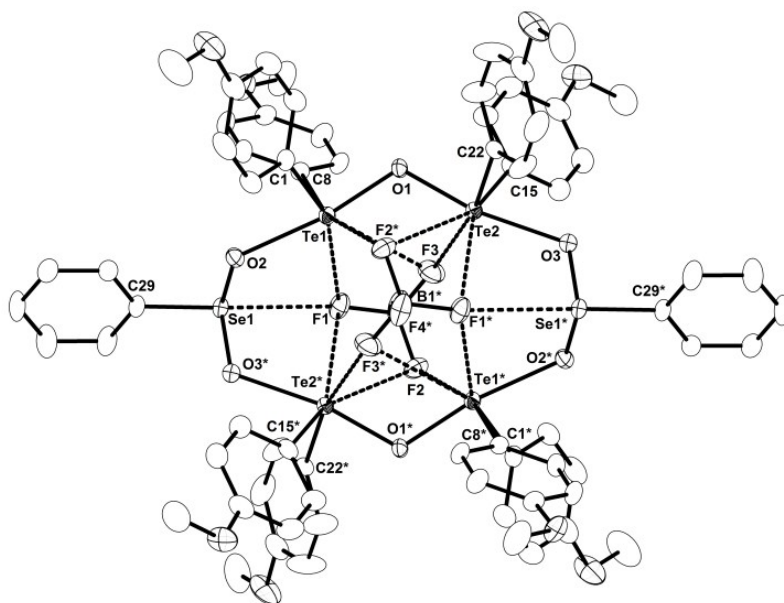

(c)

Figure S2: ORTEP representations of 2(a), 3(b) and 4(c) with the thermal ellipsoids shown at 50% probability levels. Hydrogen atoms and benzene solvates are omitted for clarity.

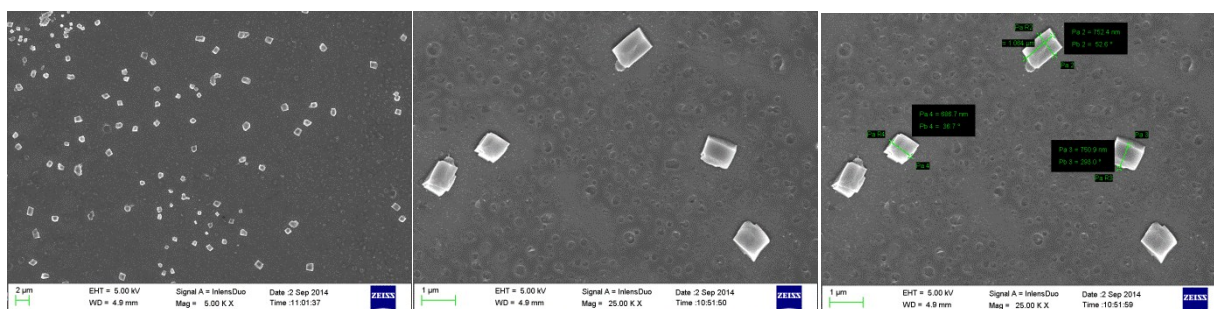

(a)

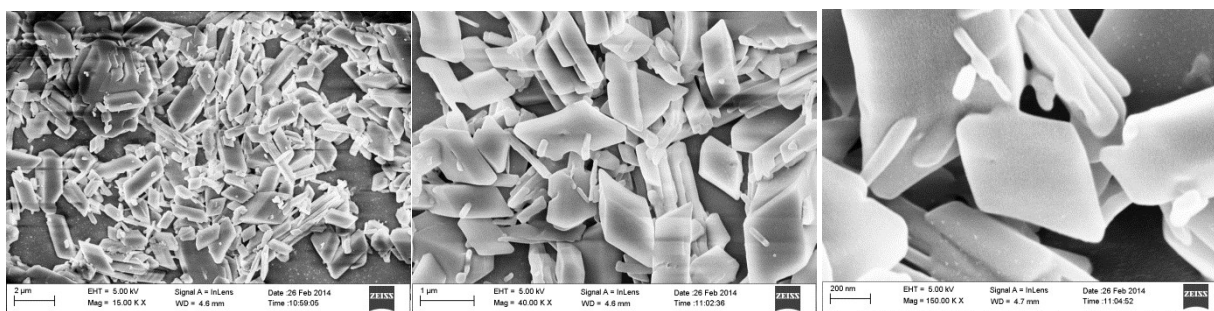

(b)

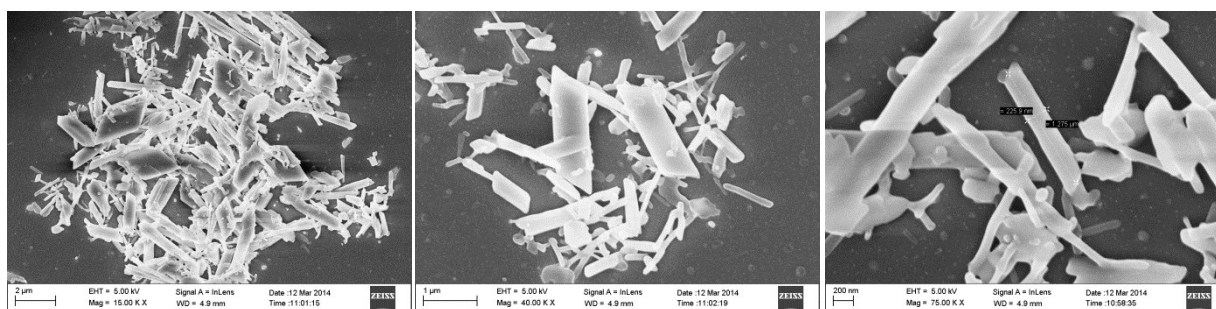

(c)

Figure S3: FE-SEM images of 2(a), 3(b) and 4(c) at varying magnifications. Samples were prepared by dispersing the compounds in toluene and drop casted on a glass plate.

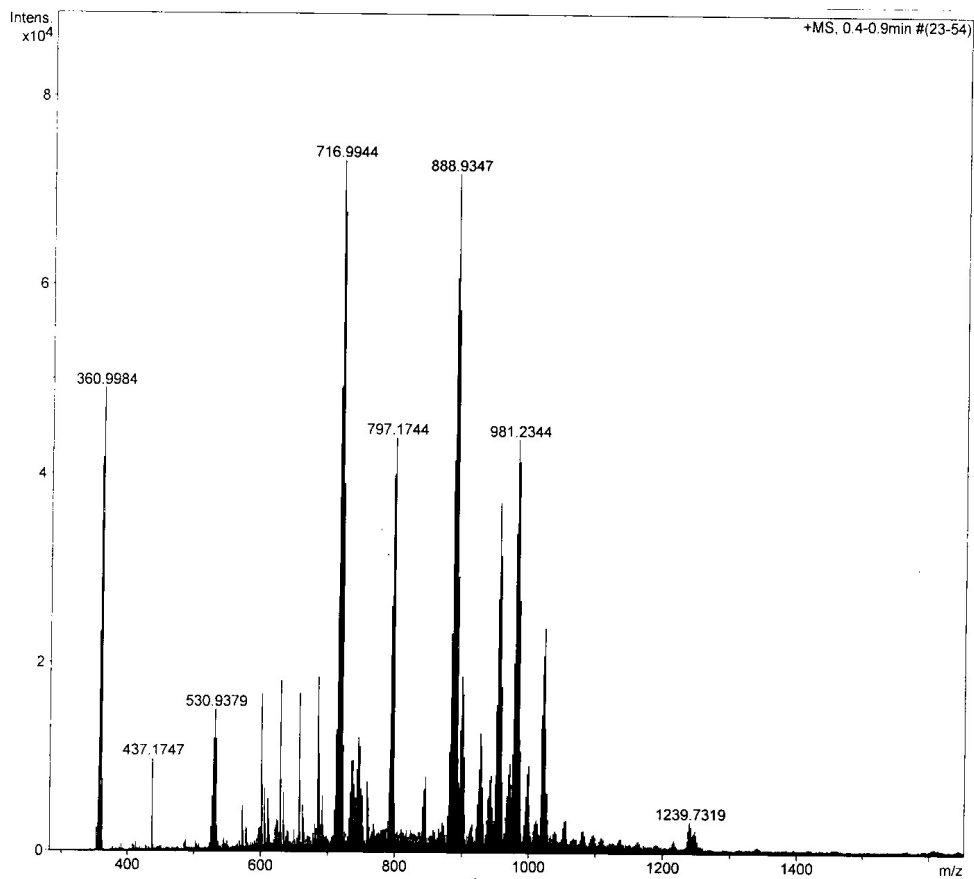

Figure S4: ESI-MS (positive ion mode in acetonitrile) of 4.



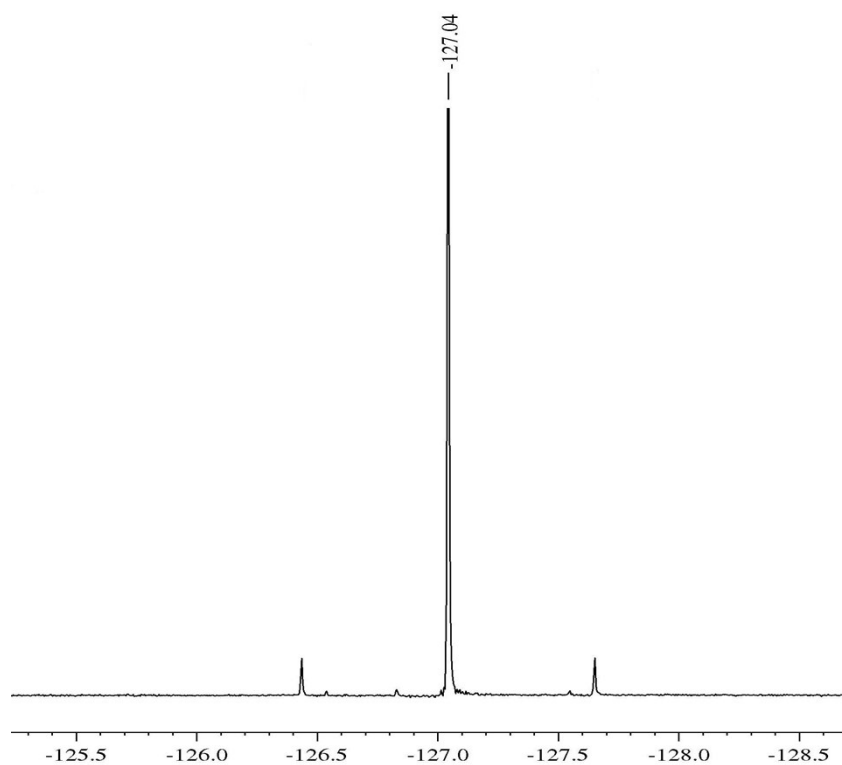

Figure S5: Solution  $^{19}\text{F}$  NMR of compound **4** showing a resonance at -127 ppm with Te satellites on both sides.
